# Supplementary material for: Tripterygium Wilfordii inhibits tonsillar IgA production by downregulating IgA class switching in IgA nephropathy
Source: PubMed Central journal article supplement (PMC5752501; doi:10.18632/oncotarget.22561), 2017-11-20
Supplement: oncotarget-08-109027-s001.pdf [file oncotarget-08-109027-s001.pdf]

## Tripterygium Wilfordii inhibits tonsillar IgA production by downregulating IgA class switching in IgA nephropathy

### SUPPLEMENTARY MATERIALS

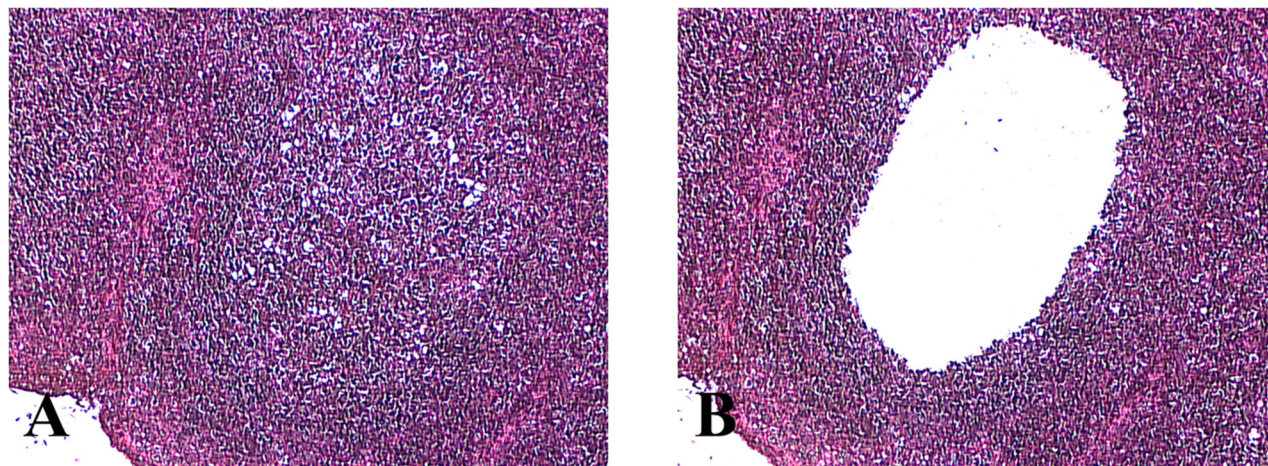

**Supplementary Figure 1: Laser capture microdissection was performed to extract GC components from tonsils.** HE staining of a sample before (A) and after (B) laser capture microdissection of the GC components in tonsils fixed by periodate-lysine-paraformaldehyde (PLP) and RNAlater.

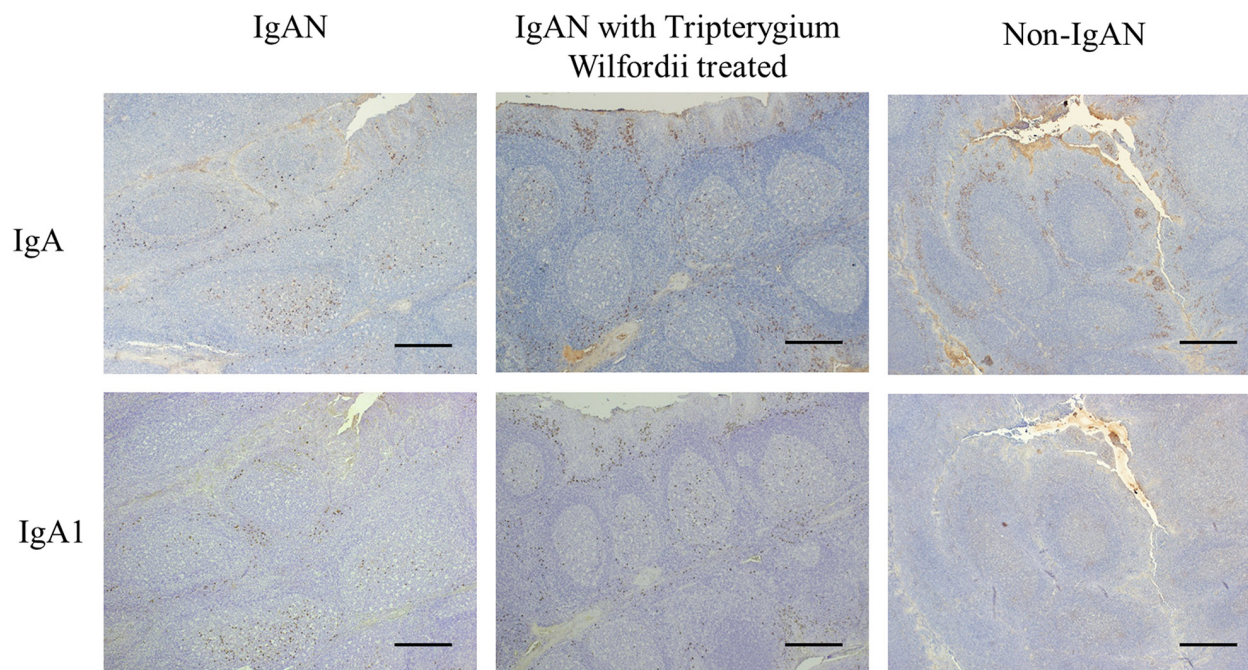

**Supplementary Figure 2: IgAN patients with Tripterygium Wilfordii treatment exhibited decreased numbers of IgA1-bearing cells in their tonsils.** Immunohistochemistry of IgA1 in the tonsils of IgAN patients and non-IgAN patients with chronic tonsillitis showed IgA1-bearing cells in the follicular germinal centers (GCs), reticular crypt epithelium (Ep), and subepithelial area. Bars, 200  $\mu$ m.

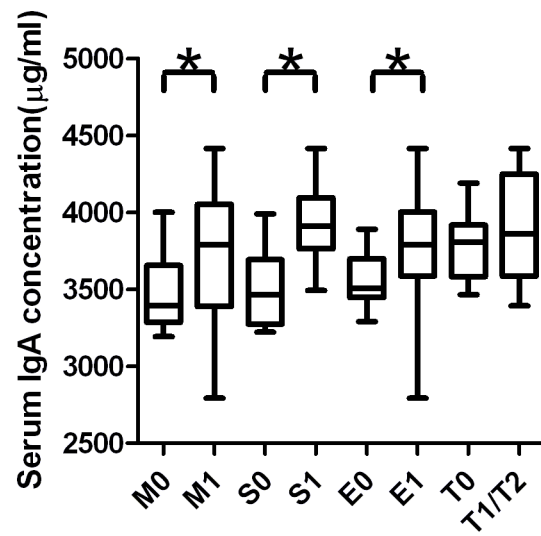

Supplementary Figure 3: Relationship between histopathological parameters and serum IgA level of IgAN.
